# Supplementary material
Source: publisher figshare collection journal article supplement (https://gsapubs.figshare.com/ndownloader/files/22741364)
Supplement: Supplementary file 1 [file 22741364]

Table DR1A: UNIT DESCRIPTIONS FOR ALLUVIAL FAN TRENCHES, EDEN MILLS, VERMONT

| Unit Identifier                | Grain size                                                                                                    | Soil color<br>(field moist) | Soil structure                                                             | Soil consistence | Soil texture    | Other notes                                                                                                                                                                                                                                                                                                                                                                                                                                                                                                      |
|--------------------------------|---------------------------------------------------------------------------------------------------------------|-----------------------------|----------------------------------------------------------------------------|------------------|-----------------|------------------------------------------------------------------------------------------------------------------------------------------------------------------------------------------------------------------------------------------------------------------------------------------------------------------------------------------------------------------------------------------------------------------------------------------------------------------------------------------------------------------|
| (RD) Recent deposition         | Medium sand matrix with clasts from 1 to 10 cm                                                                | 2.5Y 4/2                    | N/A                                                                        | Loose            | Sand            | Recent deposition resulting from gully of the logg upstream; mostly matrix supported; about 40-50% c                                                                                                                                                                                                                                                                                                                                                                                                             |
| (TS) Topsoil                   | Wood fragments and fine sand with 5% 1 to 2 cm gravel and larger clasts as indicated on the stratigraphic log | 10YR 3/1                    | Weakly developed fine to coarse angular blocky peds                        | Friable          | Sandy loam      | Highest unit in the fan stratigraphy; contains an abu wood fragments, as well as entire logs ranging from meters long (indicated on the stratigraphic log); unit identified by its darker color as compared to the unit very firm to the touch, probably has been driven ovi vehicles or trampled by livestock; grades into the AF trench.                                                                                                                                                                       |
| (TST) Topsoil - top trench     | Silt and clay                                                                                                 | 10YR 3/1                    | Medium angular blocky peds, weakly developed                               | Very friable     | Silty clay loam | Very organic-rich; not as many wood fragments or n the TS unit; only in top trench units 6 through 10, an laterally into the TS unit; soft to touch; about 20% fir                                                                                                                                                                                                                                                                                                                                               |
| (RG) Recent gravel             | Fine sand (~15%) and medium to coarse sand matrix mixed with clasts ranging from 1 mm to 2 cm                 | 2.5Y 4/2                    | Fine to medium crumb and fine to medium blocky angular peds                | Friable to firm  | Loamy sand      | Layer of historic gravel deposition on the surface of fan; unit is very dense (almost like dried cement) an supported; pebbles and cobbles ranging in size from 20 cm and larger float in the sand/gravel matrix; poc no layering; no grading; largest clasts are closer to t area of the trench; small patches of the matrix have content; a log in the trench wall in section 5 reveals edge, suggesting that this gravel unit may be the re: increased erosion and runoff during historical loggin hillslope. |
| (BAP) Buried, plowed A-horizon | Fine sand and silt                                                                                            | 10YR 3/1                    | Very fine to coarse blocky subangular peds                                 | Friable          | Loam            | Third highest unit in the stratigraphy; defined by its c and abrupt, straight, lower contact indicating that it v at some point in the past; has a greasy feel due to a organic content, and rubs black on fingers; more firr layer below; ~5% medium roots; occasional cobble- as indicated on the stratigraphic log; massive (no la; well sorted aside from the occasional cobble; not gr;                                                                                                                     |
| (A-horizon) Paleosols          | Silt and clay                                                                                                 | 5Y 2.5/1                    | N/A                                                                        | N/A              | N/A             | Paleosols were identified by a greasy feel (indicating organic content) and dark color                                                                                                                                                                                                                                                                                                                                                                                                                           |
| (S1) Sand 1                    | Fine sand and silt                                                                                            | 2.5Y 3/2                    | Moderately developed very fine to medium angular blocky peds               | Friable          | Loam            | Unit of massive sand; well-sorted; no grading; no lay some orange mottling; darker color and straight, abr contact is reminiscent of an AP layer.                                                                                                                                                                                                                                                                                                                                                                |
| (S2) Sand 2                    | Fine sand and silt                                                                                            | 2.5Y 4/2                    | Moderately developed very fine to medium angular blocky peds               | Friable          | Loam            | Massive sand unit; well-sorted; no grading; no layer distinguished from the Sand 1 unit by a slight color c the presence of paleosol markers along the top conl Sand 2 unit; could be further subdivided based on th paleosol layers within the Sand 2 unit.                                                                                                                                                                                                                                                     |
| (S3) Sand 3                    | Fine sand and silt                                                                                            | 2.5Y 4/2                    | Fine to medium crumb and coarse blocky subangular peds, strongly developed | Friable          | Sandy loam      | Unit is capped by an E-horizon and sometimes by a paleosol; sandier in E-horizon; no layering; well-sort roots or clasts.                                                                                                                                                                                                                                                                                                                                                                                        |

|                          |                                                                                                       |                          |       |                                                                                      |              |           |                                                                                                                                                                                                                                                                                                                                                                                                                                                                |
|--------------------------|-------------------------------------------------------------------------------------------------------|--------------------------|-------|--------------------------------------------------------------------------------------|--------------|-----------|----------------------------------------------------------------------------------------------------------------------------------------------------------------------------------------------------------------------------------------------------------------------------------------------------------------------------------------------------------------------------------------------------------------------------------------------------------------|
| (SP) Sand patch          | Coarse sand matrix with clasts from fine gravel (2 mm) to pebbles (2 to 3 cm)                         | 7.5YR 3/2                |       | Fine to medium crumb                                                                 | Loose        | Sand      | Unit only found in small area of top trench; cemented which rubs off as an orange-red color; well-drained; sorted; no grading or layering; fines horizontally into unit.                                                                                                                                                                                                                                                                                       |
| (SC and SC2) Silt - clay | Silt and clay with a small percentage of fine sand                                                    | 2.5Y 4/2; horizon 5Y 5/2 | E-    | Fine to coarse angular blocky peds and very fine crumb structure, strongly developed | Friable      | Silt loam | Both SC and SC2 are the same material, SC2 is low stratigraphy and separated from SC by a paleosol horizon massive and well-sorted unit; less firm to touch than has a 1 to 2 cm high leached E-horizon at the top of sometimes capped by a very thin paleosol; seems to be sandier in E-horizon; no clasts.                                                                                                                                                   |
| (GP) Gravel patches      | Fine to medium sand matrix with fine gravel (2 to 10 mm)                                              | N/A                      |       | N/A                                                                                  | N/A          | N/A       | Sand and gravel patches appear discontinuously within Sand 2 unit; mostly clast supported.                                                                                                                                                                                                                                                                                                                                                                     |
| (BS) Brown silt          | Silt and clay                                                                                         | 2.5Y 5/2; horizon 6/2    | E- 5Y | Fine to coarse angular blocky peds, strongly developed                               | Friable      | Clay loam | Sometimes topped with a thin, discontinuous paleosol has an E-horizon across most of the top 2 cm of the top trench only; distinguished by the E-horizon and a cap in the top trench, and by its color and texture in trench; no grading or layering; no clasts; well-sorted                                                                                                                                                                                   |
| (CG) Channel gravel      | Fine sand and silt matrix mixed with coarse sand and fine gravel                                      | 10YR 3/1                 |       | Fine to very coarse crumb, weakly developed                                          | Very friable | Sand      | Clasts are generally rounded, and seem to line up in layers, though no obvious gradation or sorting; large percentage of 2cm pebbles (about 5 to 10%); interbedded fine sand (FS, similar characteristics to SC) as indicated in stratigraphic log; many wood pieces in the fine sand seeping through the unit carries Fe which pooled in of the trench; clast supported; clasts range from 1cm to large roots near top of unit in top trench sections 7 to 10 |
| (FS) Fine sand           | N/A                                                                                                   | N/A                      |       | N/A                                                                                  | N/A          | N/A       | See notes for Channel gravels, above.                                                                                                                                                                                                                                                                                                                                                                                                                          |
| (GS) Gley silt           | Fine sand and silt                                                                                    | 6/10 Y Gley              |       | Coarse blocky angular peds, strongly developed                                       | Firm         | Silt loam | Distinguished based on color and texture; gleyed by groundwater; yellow tint in the seasonal water table area due to Fe oxidation; capped by a very thin and discontinuous paleosol layer; very dense and much firmer to touch than above units; massive; without roots or well sorted; no grading.                                                                                                                                                            |
| (GG) Gley gravel         | Medium and coarse sand matrix with clasts ranging from fine gravel (0.5 cm) to small pebbles (2-3 cm) | 6/5 GY Gley              |       | Fine to medium crumb structure                                                       | Loose        | Sand      | Low in the stratigraphy; turned a gley color by the groundwater table; clast supported with no sorting or grading; no layering, although there are patches where the small clasts line up into beds.                                                                                                                                                                                                                                                           |

Table DR2A: UNIT DESCRIPTIONS FOR ALLUVIAL FAN TRENCHES, BRISTOL, VERMONT

| Unit Identifier        | Grain size                                                                                                                                                                         | Soil color                      | Soil structure                                                                            | Soil consistence           | Soil texture                  | Other notes                                                                                                                                                                                                                                                                                                                                                                                                                                                                          |
|------------------------|------------------------------------------------------------------------------------------------------------------------------------------------------------------------------------|---------------------------------|-------------------------------------------------------------------------------------------|----------------------------|-------------------------------|--------------------------------------------------------------------------------------------------------------------------------------------------------------------------------------------------------------------------------------------------------------------------------------------------------------------------------------------------------------------------------------------------------------------------------------------------------------------------------------|
| (Ap) Ap/Topsoil        | Fine sand and fine gravel                                                                                                                                                          | 10YR 3/2                        | Strongly developed fine to coarse granular and very fine to coarse subangular blocky peds | Top: Friable<br>Stem: Firm | Loam                          | Ap layer is covered by 10 to 25 cm of slash (pieces of wood and leaves that have been piled up on the fan by the landowner who cuts wood here); abrupt lower Ap also contains large pieces of rotted wood and clay platy and firmer than lower layers; poorly drained; all fine to very coarse roots; about 30% coarse fragments (cm); less slash in stem trench.                                                                                                                    |
| (UG) Upper gravel      | Matrix: medium to coarse sand with fine gravel (3 to 6 mm); clasts are gravel and pebbles (1 to 6 cm) with occasional clasts up to 10 to 15 cm.                                    | 2.5Y 5/4                        | Weakly developed very fine to fine granular structure                                     | Loose                      | Sand                          | Larger clasts are usually thin, long pieces of schist; clasts are quartzite; sandier in section 7 and 8 of site where it is a sandy loam (all other characteristics are same).                                                                                                                                                                                                                                                                                                       |
| Paleosol               | Very fine sand and silt                                                                                                                                                            | 7.5YR 2.5/1                     | Moderately developed fine to medium granular and fine to medium subangular blocky peds    | Friable                    | Loam                          | Identified by color, greasy feel and black streak; distinct throughout both trenches; represents buried A-horizon                                                                                                                                                                                                                                                                                                                                                                    |
| (LS) Lower sand unit   | Fine sand and silt                                                                                                                                                                 | 10YR 3/2                        | Moderately developed fine to coarse angular blocky peds                                   | Friable                    | Loam                          | This is a continuous layer that is darkish in color; so has discontinuous organic streaks close to the top of the horizon appears to grade downwards to a B-horizon which is the same color as the lower gravel unit, and further grades into the horizon at lower depth.                                                                                                                                                                                                            |
| (FG) Fine gravel       | Medium sand and fine gravel                                                                                                                                                        | 10YR 4/4                        | Weakly developed very fine granular peds                                                  | Loose                      | Sand                          | Similar characteristics to the lower gravel unit, except the larger clasts; not a very thick unit, possibly a separate small event; clasts range from 0.5 to 3 cm, but most in the 1 cm range.                                                                                                                                                                                                                                                                                       |
| (Gr) Gravel            | Coarse sand and fine gravel                                                                                                                                                        | 2.5Y 4/4                        | Weakly developed fine to medium granular and medium subangular blocky peds                | Friable                    | Sand                          | Discontinuous unit in stem trench; weak horizontal lamination; the more sandy patches; may correlate with fine gravel unit                                                                                                                                                                                                                                                                                                                                                           |
| (S) Sand               | Fine sand                                                                                                                                                                          | 10YR 3/2                        | Moderately developed very fine to coarse angular blocky peds                              | Friable to firm            | Sandy loam                    | Contains about 10% coarse fragments of gravel, 2 to 5 mm; not well drained; a few roots; firmer to touch than loam                                                                                                                                                                                                                                                                                                                                                                   |
| (FG2) Fine gravel 2    | Coarse sand and fine gravel                                                                                                                                                        | 10YR 4/3                        | Weakly developed medium angular blocky peds                                               | Friable                    | Sand                          | Gravel clasts from 2 mm to 3 cm; could be part of G                                                                                                                                                                                                                                                                                                                                                                                                                                  |
| (LG) Lower gravel unit | Matrix: fine to medium sand in top trench, medium to coarse sand in stem trench; clasts range from fine gravel (2mm) to large cobbles (20 cm); most clasts are pebbles (2 to 5 cm) | Top: 10YR 4/4<br>Stem: 2.5Y 5/4 | Moderately developed medium to very coarse granular peds                                  | Very friable               | Top: Loamy sand<br>Stem: Sand | Clasts are composed of quartzite or quartz and are matrix supported in top trench, clast supported in stem trench; some horizontal lamination of fine gravel/sand; matrix gets coarser towards apex of fan; unit may be divided into three sub-units; moderately well drained; about 3% and fine roots; clasts are weakly imbricated in stem trench; structureless; very well drained and prone to caving; fingers are separated by patches of MS unit in stem trench sections 9-11. |

|                       |                                                   |          |                                                                           |                         |                    |                                                                                                                                                                                                                                                                                                                                                                    |
|-----------------------|---------------------------------------------------|----------|---------------------------------------------------------------------------|-------------------------|--------------------|--------------------------------------------------------------------------------------------------------------------------------------------------------------------------------------------------------------------------------------------------------------------------------------------------------------------------------------------------------------------|
| (SP) Sand patch       | Fine sand                                         | 2.5Y 3/2 | Moderately developed fine granular and fine to medium angular blocky peds | Friable                 | Loam               | Only appears in sections 1 - 3 in top trench.                                                                                                                                                                                                                                                                                                                      |
| (TT) Tree throw       | Fine sand                                         | 2.5Y 3/3 | Moderately developed very fine to coarse subangular blocky peds           | Very friable            | Sandy loam         | Below LG unit; contains organic patches (with color 3/2) and some large rocks                                                                                                                                                                                                                                                                                      |
| (MS) Massive sand     | Medium sand                                       | 2.5Y 4/4 | Moderately developed very fine to medium blocky angular peds              | Friable                 | Sandy loam         | Massive, homogeneous sand, 2 to 5 cm thick that c unit in sections 6-11; contains some charcoal; appe an erosional upper contact and depositional lower c roots; no clasts; moderately well-drained but less so BS unit; sand with same characteristics also presen fingers of the LG unit in the distal portion of the fan.                                       |
| (BS) Bedded sand      | Medium to coarse sand and fine gravel (2 to 5 mm) | 2.5Y 4/4 | Weakly developed fine to coarse angular blocky peds                       | Friable                 | Loamy sand         | Sand and fine gravel is the matrix for larger clasts r 1 to 6 cm; unit is capped by MS unit in sections 6-11 can be divided into sub-units as indicated by dasher seems to have been partially eroded by the overlyin unit in sections 1-5; unit is interrupted by a tree thro 5; moderately well-drained; no roots; about 30 % co fragments and 70 % coarse sand. |
| (D1) Disturbed area 1 | Medium sand                                       | 10YR 4/3 | Moderately developed very fine to coarse angular blocky peds              | Friable                 | Sandy loam         | Appears to be a human-dug pit, possibly part of son work done by property owner last summer; abruptly natural layers; no visible structures; homogenized s; few large clasts; about 3% fine roots (no roots in adj layering) and some charcoal pieces.                                                                                                             |
| (D2) Disturbed area 2 | Medium and fine sand and fine gravel (1 cm size)  | 2.5Y 3/3 | Weakly developed fine granular and fine to medium subangular blocky peds  | Very friable            | Sandy loam         | Interpreted to be another tree throw.                                                                                                                                                                                                                                                                                                                              |
| (D3) Disturbed area 3 | Fine to coarse sand and gravel                    | 10YR 3/3 | Weak fine crumb structure                                                 | Very friable to friable | Sand to sandy loam | Area is lined with dark, organic-rich fine sand (color 3/2) with about 20% gravel (1 cm size); center of are sand with a color of 2.5Y 5/4.                                                                                                                                                                                                                        |

Table DR3A: UNIT DESCRIPTIONS FOR ALLUVIAL FAN TRENCHES, HANCOCK, VERMONT

| Unit Identifier                   | Grain size                        | Soil color                      | Soil structure                                                                       | Soil consistence | Soil texture | Other notes                                                                                                                                                                                                                                                                                                                                                                                                                    |
|-----------------------------------|-----------------------------------|---------------------------------|--------------------------------------------------------------------------------------|------------------|--------------|--------------------------------------------------------------------------------------------------------------------------------------------------------------------------------------------------------------------------------------------------------------------------------------------------------------------------------------------------------------------------------------------------------------------------------|
| (Sg) Sand and gravel              | Fine sand matrix with fine gravel | Top: 10YR 3/3<br>Stem: 2.5Y 3/3 | Weakly developed very fine to medium crumb and fine to medium blocky subangular peds | Friable          | Sandy loam   | Matrix supported; fine sand matrix with 15% coarse of mostly fine gravel 2 mm to 2 cm size; occasional to 4 cm; 5% fine roots; poorly drained.                                                                                                                                                                                                                                                                                 |
| (dashed line)<br>Topsoil boundary | N/A                               | 2.5Y 3/2                        | N/A                                                                                  | N/A              | N/A          | Color change due to modern soil development process the fan surface; carries characteristics of identified unit for color; 10% very fine and fine roots.                                                                                                                                                                                                                                                                       |
| (S) Sand                          | Medium sand to silt               | Top: 2.5Y 3/3<br>Stem: 10YR 4/3 | Moderately developed very fine to medium angular blocky peds                         | Friable          | Sandy loam   | Color is redder (10YR 4/4) where shaded on log; matrix with isolated pieces of gravel from 1 to 3 cm in size; usually continuous over 2-3 meters and bracket (above and below) a larger gravel unit; not well-drained.                                                                                                                                                                                                         |
| (Gr) Gravel                       | Medium sand to cobbles            | Top: 2.5Y 3/2<br>Stem: 10YR 4/3 | Weakly developed very fine to fine crumb peds                                        | Loose            | Sand         | Clast supported and composed of 50% or more clasts than coarse sand; many gravel units have clasts only 1 cm in size; gravel units coarsen higher in trench; clasts in any unit are 20-30 cm; no obvious imbrication although 4 cm sized pebbles tend to line up in horizontally; no layering; well-drained.                                                                                                                   |
| (Fg) Fine gravel                  | Medium sand to gravel             | 10YR 4/3                        | Weakly developed very fine crumb peds                                                | Loose            | Sand         | Unit appears in isolated patches; poorly-sorted; may associated with gravel units that are fining laterally; bounded above and below by sand; well-drained.                                                                                                                                                                                                                                                                    |
| (YS) Yellow sand                  | Medium and fine sand              | 2.5Y 4/4                        | Moderately developed very fine to medium subangular blocky peds                      | Very friable     | Sandy loam   | Slightly coarser than other sand units, and lighter in color than rocks or gravel present in this unit; often overlies a contact between the two from bioturbation; mostly fine sand in sections 1 and 2; more medium sand, more friable, and lightens to 5Y 5/4 in sections 13-14; mixed with the darker sand unit in section 2; weak cross-bedding in top trench, lower left of grid 2.                                      |
| Paleosol                          | Fine sand                         | 2.5Y 2.5/1                      | Moderately developed fine subangular blocky peds                                     | Friable          | Loam         | Discontinuous; sometimes weaves through a gravel unit typically 2 to 3 cm wide; greasy texture and rubs black on fingers indicating a concentration of organic material.                                                                                                                                                                                                                                                       |
| (SP) Slash pit                    | Fine sand matrix with gravel      | 10YR 3/1                        | Weakly developed very fine to fine crumb and fine blocky subangular peds             | Friable          | Loam         | This area appears to have been disturbed as it intersects fan stratigraphy and contains an abundance of fresh wood fragments; probably a fill pit from vegetation removal area; 20 to 30% wood fragments ranging from 1 to 2 cm and up to 0.5 cm wide; soil matrix feels greasy and dark on fingers; 15% coarse fragments of gravel 0.5 to 2 cm; occasional pebbles (4 - 6 cm); 5% fine roots (no roots in surrounding units). |
| (St) Silt                         | Silt and fine sand                | 2.5Y 4/3                        | Strongly developed fine to medium angular blocky peds                                | Friable to firm  | Loam         | Occasional gravel (1 cm size) in isolated pieces or small pockets of 5 to 10 grains; layer is continuous upstream of bedrock outcrop, discontinuous downstream of bedrock; is redder at top of trench.                                                                                                                                                                                                                         |
| (Gs) Gravel and silt              | Silt matrix with cobbles          | 10YR 4/3                        | Moderately developed fine crumb and fine to medium subangular blocky peds            | Friable          | Loam         | Cobbles supported by a silt and fine sand matrix; cobbles usually touching, but are isolated in matrix material in spots; cobbles range from 4 to 20 cm; underlies a bioturbation horizon; approximately 20 - 30% coarse fragments.                                                                                                                                                                                            |

Table DR4A: UNIT DESCRIPTIONS FOR ALLUVIAL FAN TRENCHES, BRIDGEWATER CORNERS, VERMONT

| Unit Identifier                | Grain size                                            | Soil color | Soil structure                                                                                             | Soil consistence | Soil texture                         | Other notes                                                                                                                                                                                                                                                                                                                     |
|--------------------------------|-------------------------------------------------------|------------|------------------------------------------------------------------------------------------------------------|------------------|--------------------------------------|---------------------------------------------------------------------------------------------------------------------------------------------------------------------------------------------------------------------------------------------------------------------------------------------------------------------------------|
| (above dashed line)<br>Topsoil | N/A                                                   | 10YR 3/2   | Moderately developed<br>very fine to medium<br>subangular blocky and<br>very fine to fine granular<br>peds | Friable          | Loam                                 | Topsoil cuts across stratigraphic units and was defined on coloration due to recent soil profile development changes in texture; takes on characteristics of the silt unit it overprints; 15% very fine to medium roots with occasional coarse roots; more densely packed than units, possibly from animal grazing.             |
| (S) Sand                       | Fine sand and silt                                    | 10YR 3/4   | Moderately developed,<br>very fine to coarse,<br>subangular blocky and<br>angular crumb peds               | Friable          | Ranges from<br>sandy loam to<br>loam | Mostly massive, although bedding in localized areas of stratified coarse sand and fine gravel are common at the distal edges of the fan; isolated 1 to 5 cm clasts.                                                                                                                                                             |
| Paleosol                       | Very fine to coarse sand                              | 2.5Y 2.5/1 | Moderately developed<br>medium subangular<br>blocky peds                                                   | Friable          | Loam                                 | Buried A-horizon; greasy feel; no recognizable wood charcoal fragments; <1% coarse fragments (1-2 cm); some mottling from bioturbation; usually a uniform thickness about 3 cm.                                                                                                                                                 |
| (SGr) Sand and gravel          | Fine sand and silt matrix<br>with gravel clasts (20%) | 10YR 3/4   | Moderately developed<br>fine to medium<br>subangular blocky and<br>fine crumb peds                         | Very friable     | Sandy loam                           | Transitional unit between sand and gravel units; high proportion of sand than gravel units; matrix supported; sorted; 20% coarse fragments; most coarse fragments gravel (3 mm), but also many 2-3 cm size gravel pieces bedding or grading.                                                                                    |
| (Gr, Gr1, Gr2, Gr3)<br>Gravel  | Gravel, medium sand<br>and small cobbles              | 10YR 4/4   | Weakly developed fine to<br>coarse granular peds                                                           | Loose            | Sand                                 | Clast supported; clasts range from 3 mm to 15 cm; clasts are closer to the top of the unit in stem trench 3; clasts are weakly imbricated (especially those in the range); matrix is medium to coarse sand; over 50% fragments; clasts are more matrix supported within the layer; clasts are subrounded; lens-shaped units; we |
| (GS) Grey silt                 | Silt and fine sand                                    | 2.5Y 5/3   | Moderately developed<br>very fine to coarse<br>granular and medium<br>subangular blocky peds               | Friable          | Loam                                 | Massive; isolated gravel pieces (<1%); high moisture; larger proportion of silt than other sand units (60-70% roots).                                                                                                                                                                                                           |

Table DR5A: UNIT DESCRIPTIONS FOR ALLUVIAL FAN TRENCHES, MAIDSTONE, VERMONT

| Unit Identifier         | Grain size                                | Soil color                                | Soil structure                                                                  | Soil consistence | Soil texture | Other notes                                                                                                                                                                                                                                                                                                                                                                                                                                                                                                                                                          |
|-------------------------|-------------------------------------------|-------------------------------------------|---------------------------------------------------------------------------------|------------------|--------------|----------------------------------------------------------------------------------------------------------------------------------------------------------------------------------------------------------------------------------------------------------------------------------------------------------------------------------------------------------------------------------------------------------------------------------------------------------------------------------------------------------------------------------------------------------------------|
| (WS) White sand         | Fine and medium sand                      | 2.5Y 6/3                                  | Weakly developed medium crumb and medium angular blocky peds                    | Very friable     | Loamy sand   | Very clean, white sand with thin laminations of brown sand; unit is generally continuous across the trench; patches of coarse sand exist in small discontinuities along the bottom of the unit; not many roots; well-sorted with very few clasts larger than coarse sand; bedding and braiding structures visible in sections of the top trench and section 2 and 3 of the stem trench; laminations and unit boundaries are often wavy, especially in the upper stratigraphy; white sand is less continuous than brown sand units; often has an eroded upper contact |
| (St) Silt               | Silt with a small proportion of fine sand | Top: 5Y 4/2<br>Stem: 2.5Y 4/1             | Moderately developed fine to coarse subangular blocky peds                      | Friable          | Silt loam    | Silt unit was identified by texture and is continuous across the trench; always interbedded with sand; the silt is sometimes patchy and often acts as a thin (1 cm) sand unit; silt units are thicker and more continuous than sand units in the stratigraphy; very dense and homogenous; poorly sorted; silt is firmer and more sorted than sand in the lower stratigraphy; massive; silt also appears as armor clasts (2 to 3 cm in diameter) in sand units                                                                                                        |
| (BS) Brown sand         | Medium and fine sand                      | Top: 2.5 Y 4/2<br>Stem: 2.5Y 5/3          | Weakly developed fine to medium crumb and fine to medium subangular blocky peds | Very friable     | Loamy sand   | Interbedded with silt or other sand units; appears as a thin layer with little or no sedimentary structures preserved; for faint bedding visible in some places; bedding/laminations more obvious in some units of the stem trench; unit is typically continuous across the entire trench; some units show an erosive lower contact with white sand; not ripple marked; moist longer than other sand units; often capped by silt in the stem trench; fairly homogeneous; some laminations visible within the sand.                                                   |
| (CBS) Coarse brown sand | Medium sand and about 25% coarse sand     | 2.5Y4/2                                   | Weakly developed fine to medium crumb and fine to medium subangular blocky peds | Very friable     | Loamy sand   | Same as brown sand but coarser; some isolated clasts of fine gravel.                                                                                                                                                                                                                                                                                                                                                                                                                                                                                                 |
| (TT) Tree throw area    | Medium sand                               | 2.5Y 5/3                                  | Weakly developed fine crumb and fine subangular blocky structure                | Very friable     | Loamy sand   | Isolated area of sand that cuts off other horizontal units; contains a few Fe spots and armored silt clasts; pebbles present near the top of this unit (see stratigraphic column); appears that the tree fell to the north because the unit caps other units to the north of the larger sand units                                                                                                                                                                                                                                                                   |
| (LBS) Lower buried soil | Fine sand                                 | A: 2.5 Y 3/1<br>E: 7N gley<br>B: 10YR 4/3 | Moderately developed very fine to medium subangular blocky peds                 | Friable          | Sandy loam   | Buried soil layer that extends across the entire trench; becomes the topsoil in section 1-5 of the top trench; distinct color sequence of 2 to 3 cm of dark black to thin (1 cm), leached E-horizon over a redder B-horizon (thick); firmer to the touch than units lower in the stem trench; poorly drained; many roots; feels greasy and smeary                                                                                                                                                                                                                    |

|                          |                                            |                                  |                                                                                |              |            |                                                                                                                                                                                                                                                                                                             |
|--------------------------|--------------------------------------------|----------------------------------|--------------------------------------------------------------------------------|--------------|------------|-------------------------------------------------------------------------------------------------------------------------------------------------------------------------------------------------------------------------------------------------------------------------------------------------------------|
| (UBS) Upper buried soil  | Fine sand                                  | Top: 10 YR 3/2<br>Stem: 10YR 2/1 | Moderately developed fine to medium subangular blocky peds                     | Friable      | Sandy loam | Distinguished by its faint black color; not continuous entire fan (either because it was eroded off, or simply developed fully); very dry and firm to touch; only a thick in top trench, thicker in stem trench; no soil development beneath this layer; 40% fine and coarse % fine gravel and coarse sand. |
| (Gr) Gravel              | Small cobbles in a medium sand matrix      | N/A                              | N/A                                                                            | N/A          | N/A        | Only patch of gravel in the entire fan stratigraphy; it is identical to surrounding unit; matrix-supported; clasts in size from 0.5 to 5 cm; no layering or gradation; large cobbles are clustered together.                                                                                                |
| (CSP) Coarse sand patch  | Coarse sand                                | N/A                              | Weakly developed fine crumb structure                                          | Loose        | Sand       | Same as coarse brown sand except as noted to                                                                                                                                                                                                                                                                |
| (TSA) Top sand A         | Fine sand                                  | 2.5 Y 4/4                        | Moderately developed fine to medium subangular blocky and very fine crumb peds | Friable      | Loamy sand | Beneath lower buried soil; top of unit is consistent leached E-horizon which is a very dry, medium sand coarse sand mixed in and some fine gravel with occasional pebbles 3-4 cm in diameter; the fine sand is the E                                                                                        |
| (TSB) Top sand B         | Fine to medium sand                        | 2.5 Y 5/3                        | Weakly developed fine to coarse subangular blocky peds                         | Friable      | Sandy loam | Poorly sorted with clasts ranging from 0.5 to 2 cm; firmer to touch than units below; some silt layers through this unit, and firmer to touch higher in the unit; the upper buried soil this sand becomes very dry, very packed and very firm to touch with firm peds; more closer to surface.              |
| (DA) Disturbance area    | Medium sand                                | 2.5Y 4/3                         | Weakly developed fine to medium blocky subangular peds                         | Very friable | Loamy sand | This unit is a section where the horizontal layering and the sediment is mixed together, appears to have been disturbed by a tree root or animal burrow; contains rectangular silt clasts, 1 to 2 cm in size; poorly sorted                                                                                 |
| (TSC) Top sand C         | Medium sand with 30% fine gravel           | 2.5Y 4/3                         | Weakly developed fine to coarse subangular blocky and fine crumb peds          | Very friable | Loamy sand | Grades into and out of silt; not continuous, only in certain fan stratigraphy; a few 1 to 2 cm size pebbles; firm                                                                                                                                                                                           |
| (SS) Silt and sand       | Medium to coarse sand with 15% fine gravel | 2.5 Y 5/3                        | Weakly developed fine to medium subangular blocky and fine crumb peds          | Friable      | Loamy sand | Similar to brown sand unit; no lamination;                                                                                                                                                                                                                                                                  |
| (GS) Gully sand          | Fine to medium sand                        | 2.5Y 5/3                         | Weakly developed fine to medium subangular blocky peds                         | Very friable | Loamy sand | Sand from the stream gully fill that has washed on; firmer to touch closer to fan apex; occasional strip of packed silt; coarse sand and gravel along the base in stem trench sections 6-7; no lamination; coarse patches; poorly sorted.                                                                   |
| (MBS) Massive brown sand | Medium and fine sand                       | 10YR 4/3                         | Weakly developed fine to medium subangular blocky and very fine crumb peds     | Very friable | Sandy loam | Similar to other brown sand unit; seems to be redder sands; massive; no structures; fairly homogenous                                                                                                                                                                                                       |



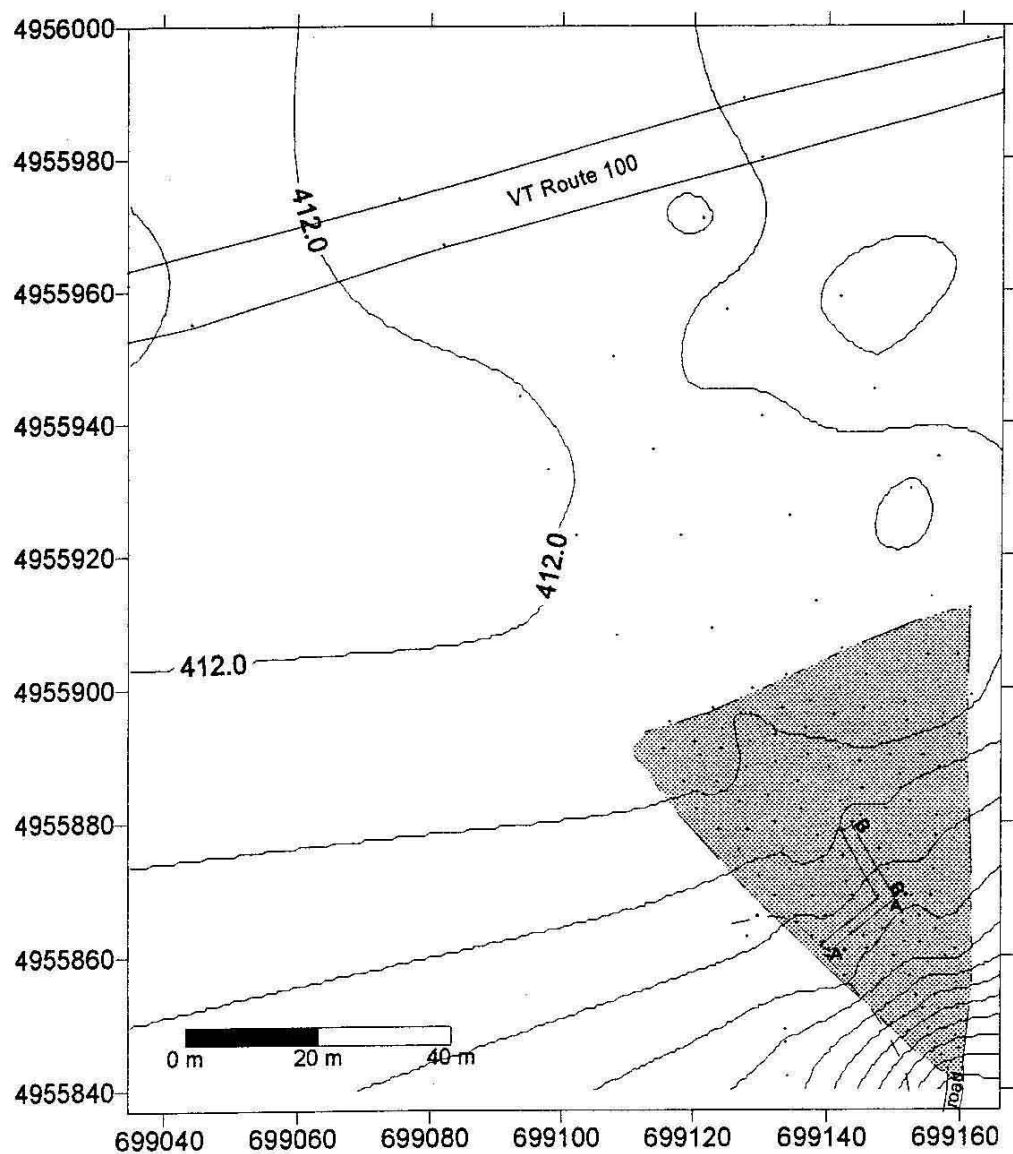

Figure DR1B. Topographic map of Eden Mills fan. X and Y axes are in UTM coordinates. Contour interval is 0.5 meter. Dots are measured survey points. A-A' and B-B' are trench locations. Dashed line is stream channel.

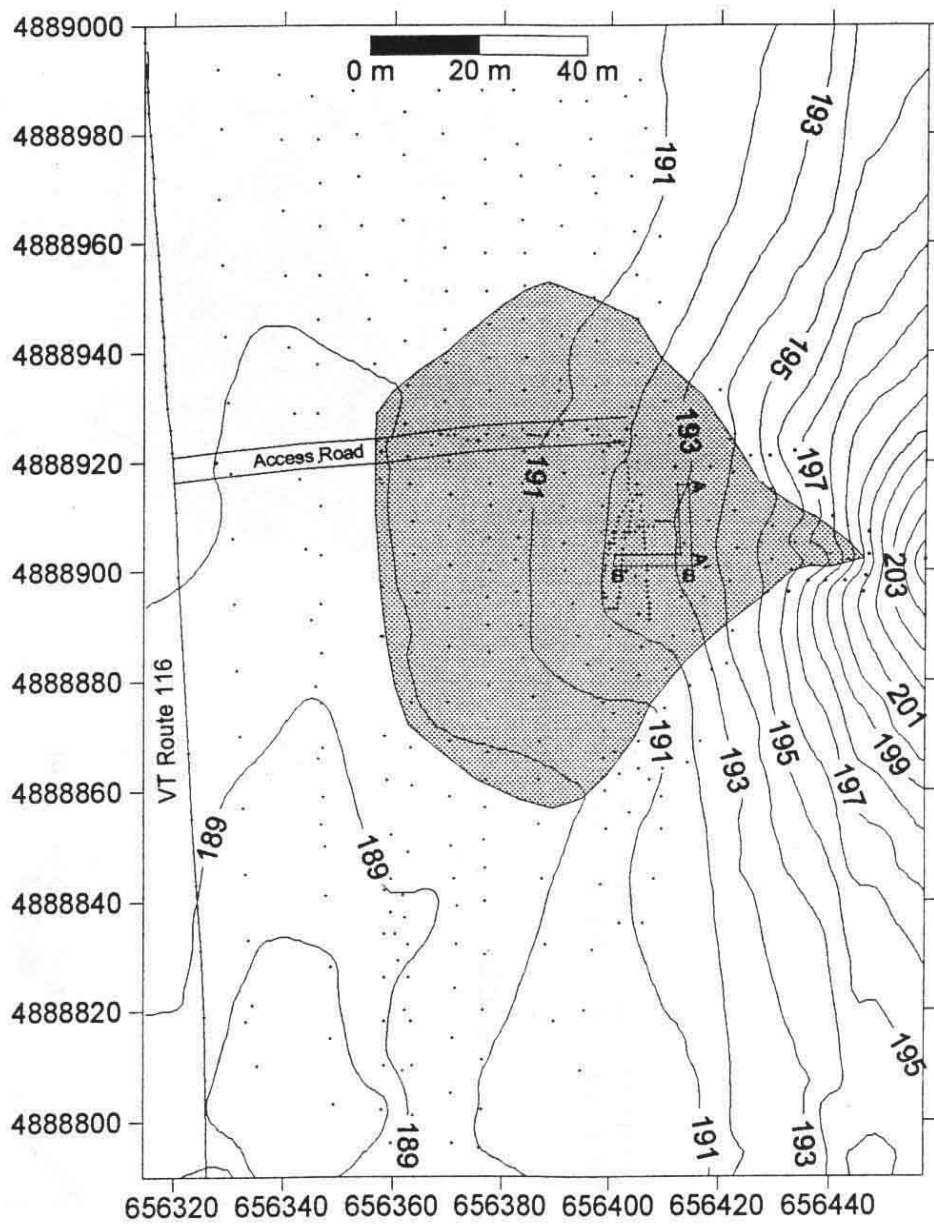

Figure DR2B. Topographic map of Bristol fan. X and Y axes are in UTM coordinates. Contour interval is 1 meter. Dots are measured survey points. A-A' and B-B' are trench locations.

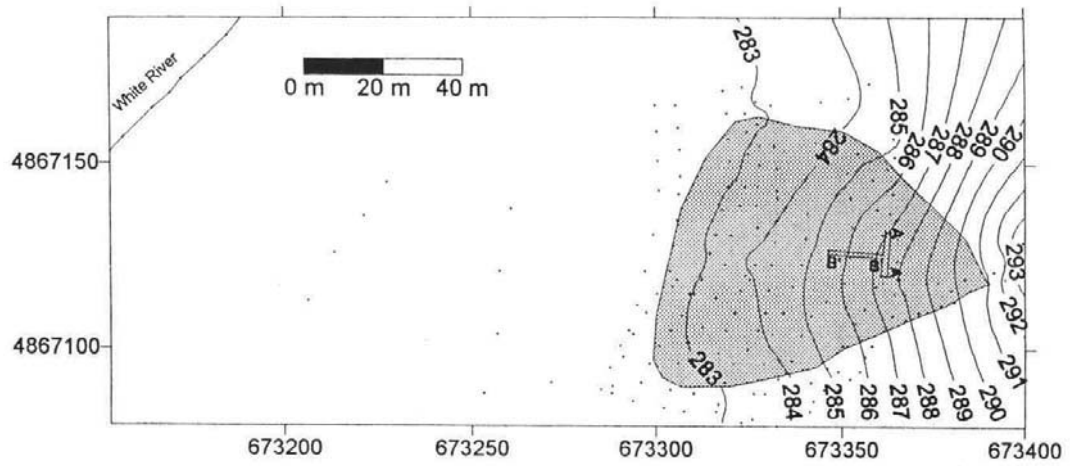

Figure DR3B. Topographic map of Hancock fan. X and Y axes are in UTM coordinates. Contour interval is 1meter. Dots are measured survey points. A-A' and B-B' are trench locations.

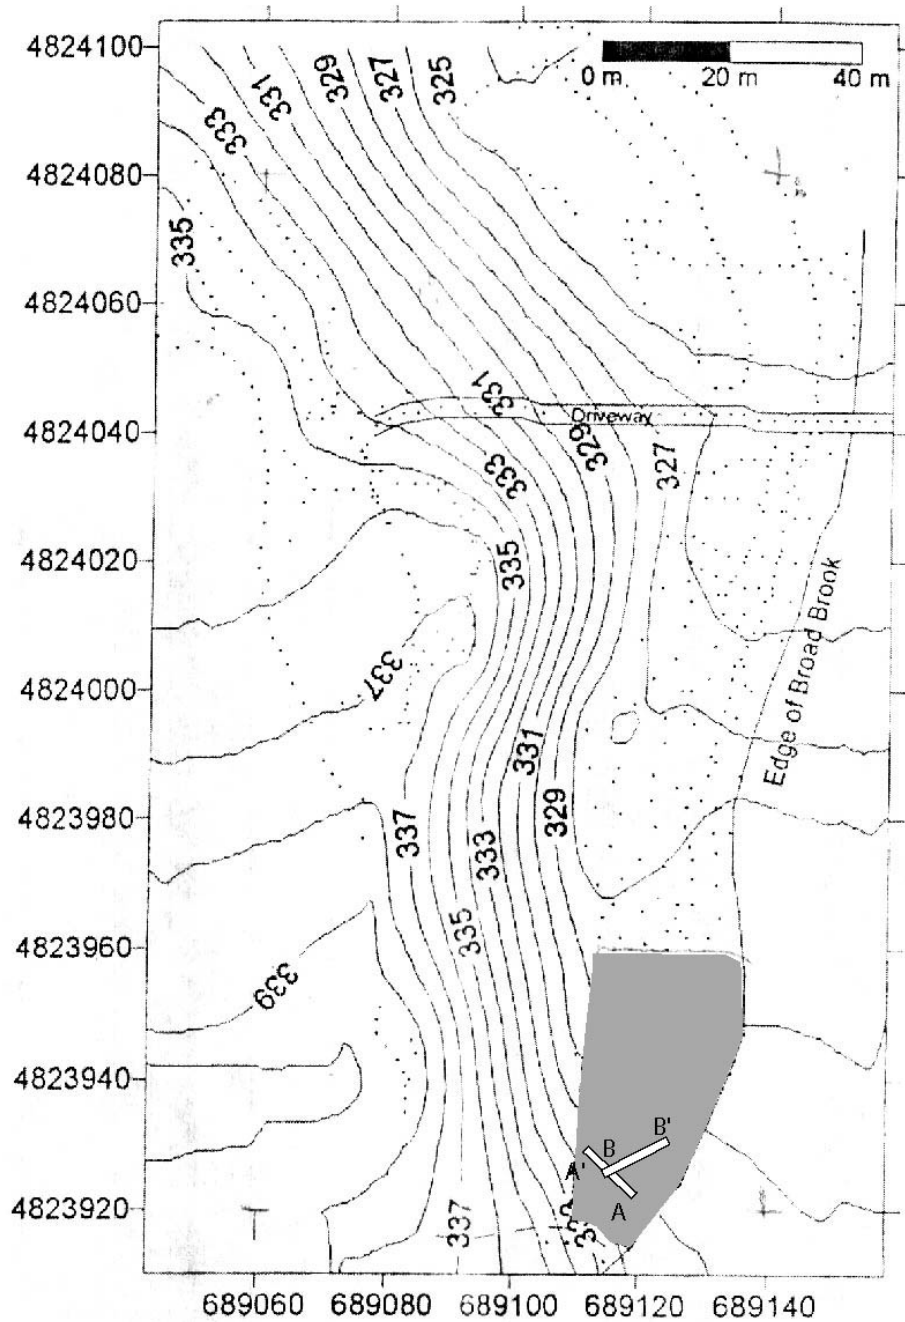

Figure DR4B. Topographic map of Bridgewater Corners fan. X and Y axes are in UTM coordinates. Contour interval is 1 meter. Dots are measured survey points. A-A' and B-B' are trench locations. Dashed line is stream channel.

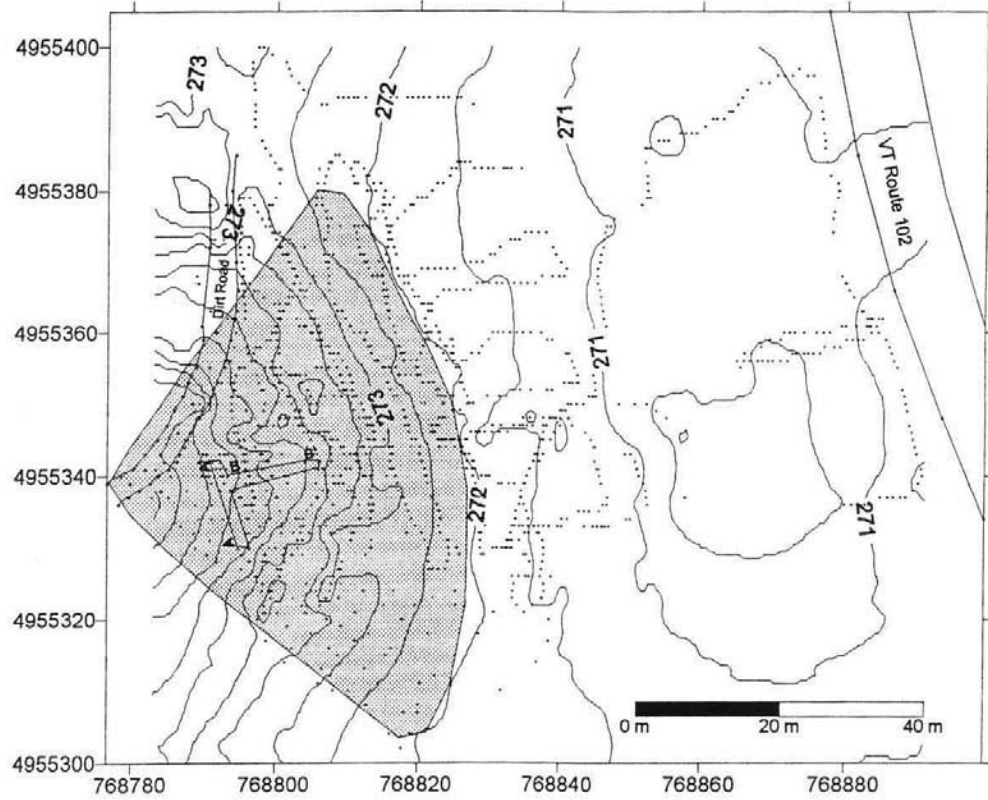

Figure DR5B. Topographic map of Maidstone fan. X and Y axes are in UTM coordinates. Contour interval is 1 meter. Dots are measured survey points. A-A' and B-B' are trench locations.

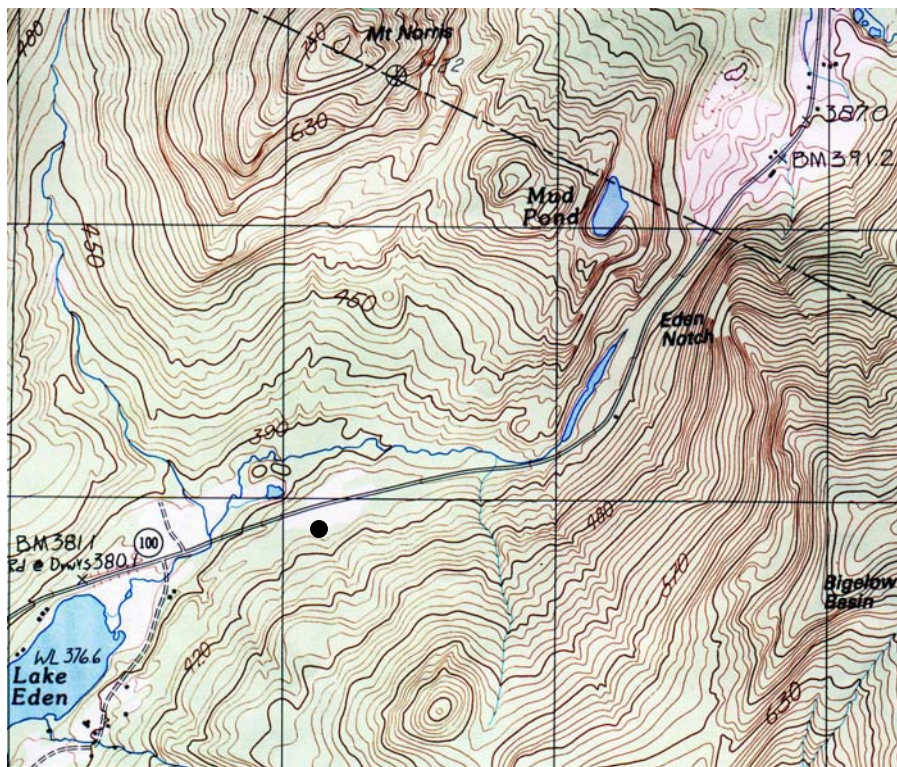

Figure DR1C. Location of Eden Mills fan (represented by black dot) on USGS 1:24,000 topographic map. Quadrangle title: Albany, Vermont.



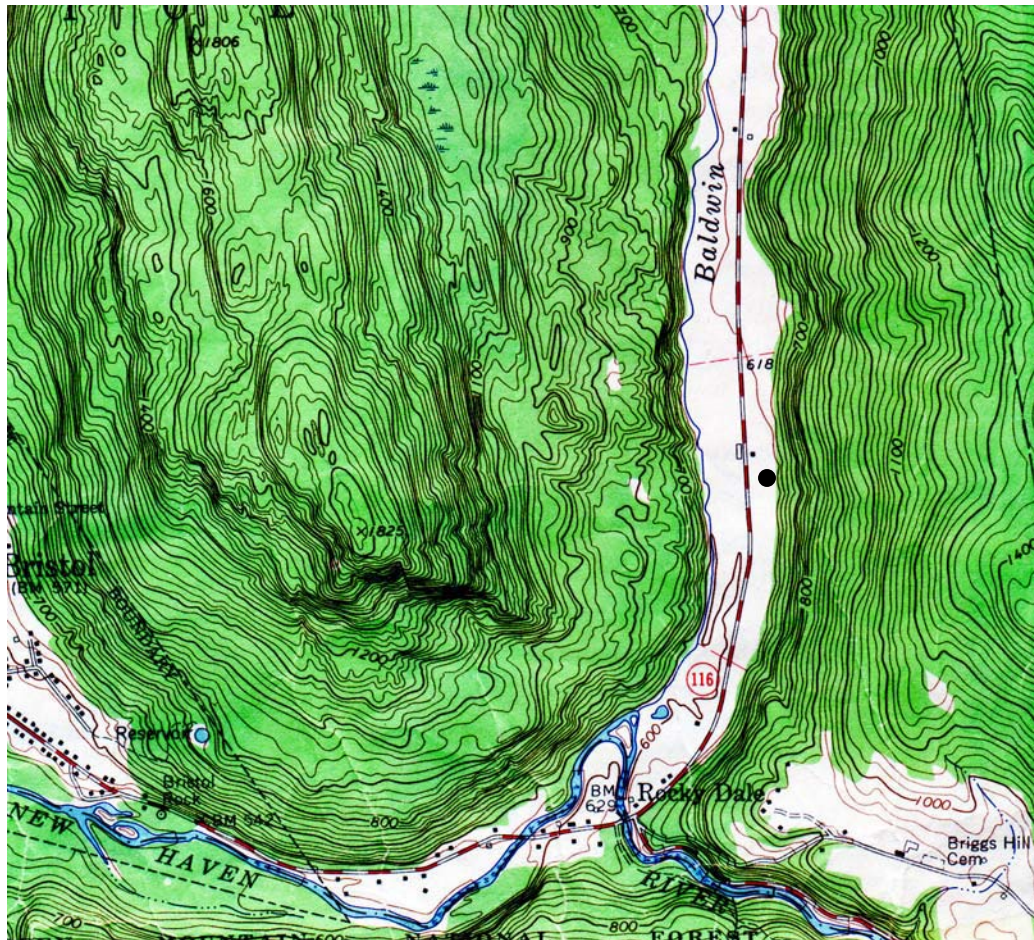

Figure DR2C. Location of Bristol fan (represented by black dot) on USGS 1:24,000 topographic map. Quadrangle title: Bristol, Vermont.



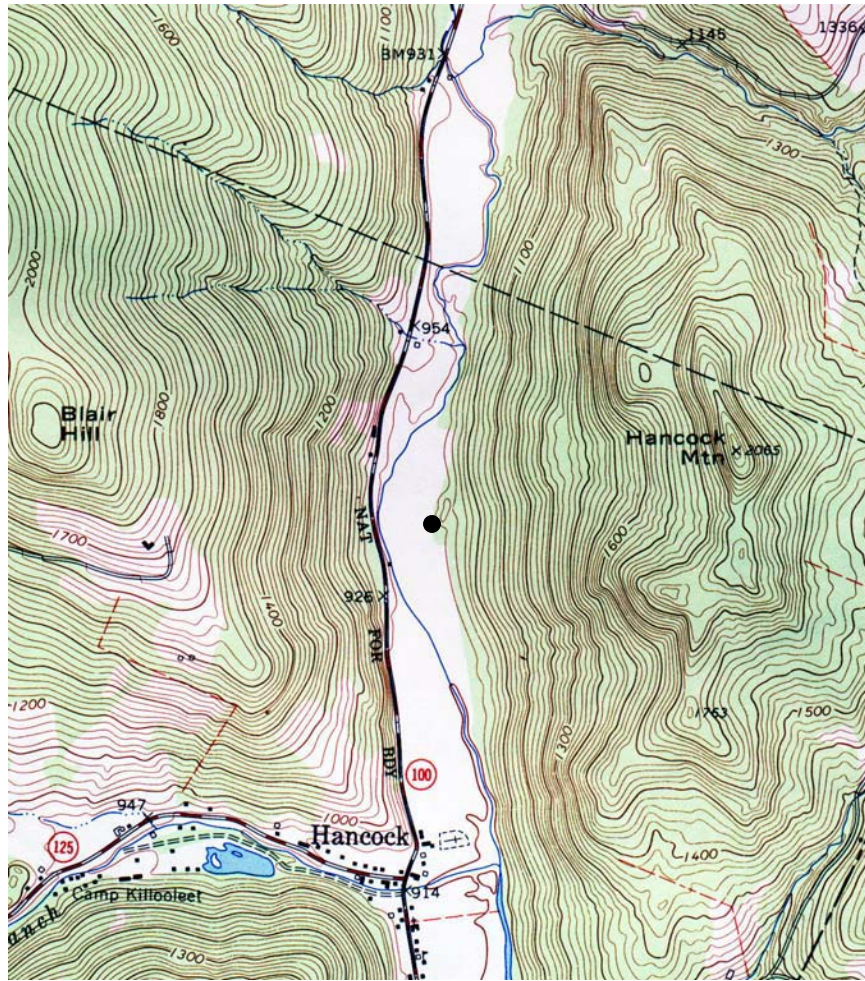

Figure DR3C. Location of Hancock fan (represented by black dot) on USGS 1:24,000 topographic map. Quadrangle title: Hancock, Vermont.



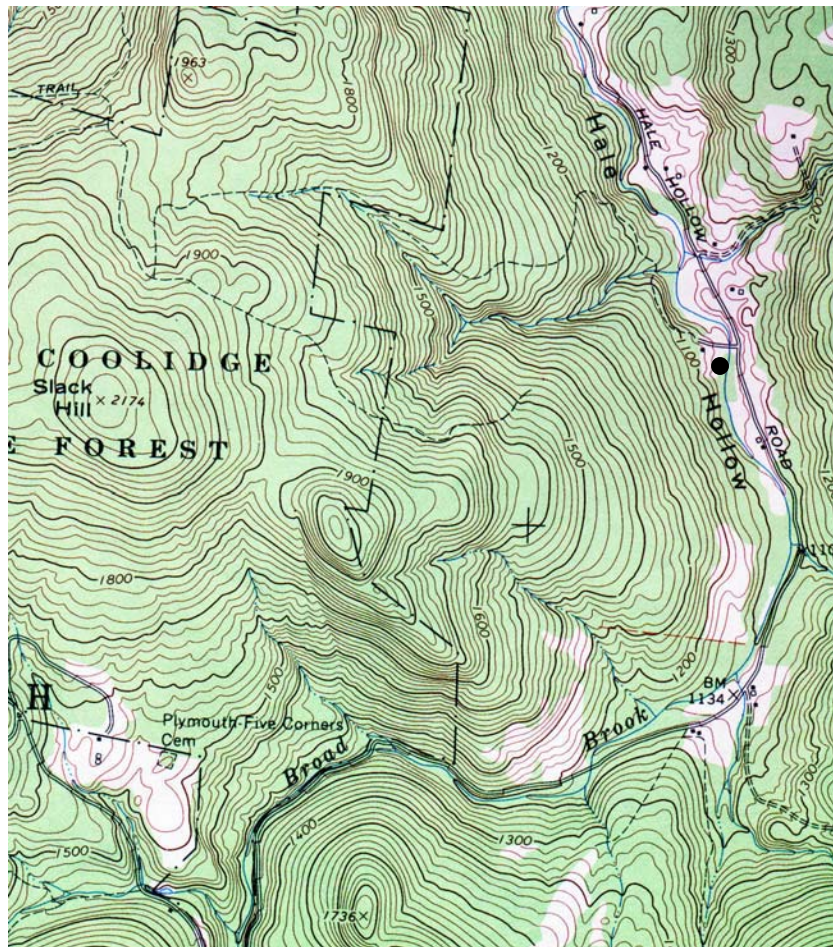

Figure DR4C. Location of Bridgewater Corners fan (represented by black dot) on USGS 1:24,000 topographic map. Quadrangle title: Plymouth, Vermont.

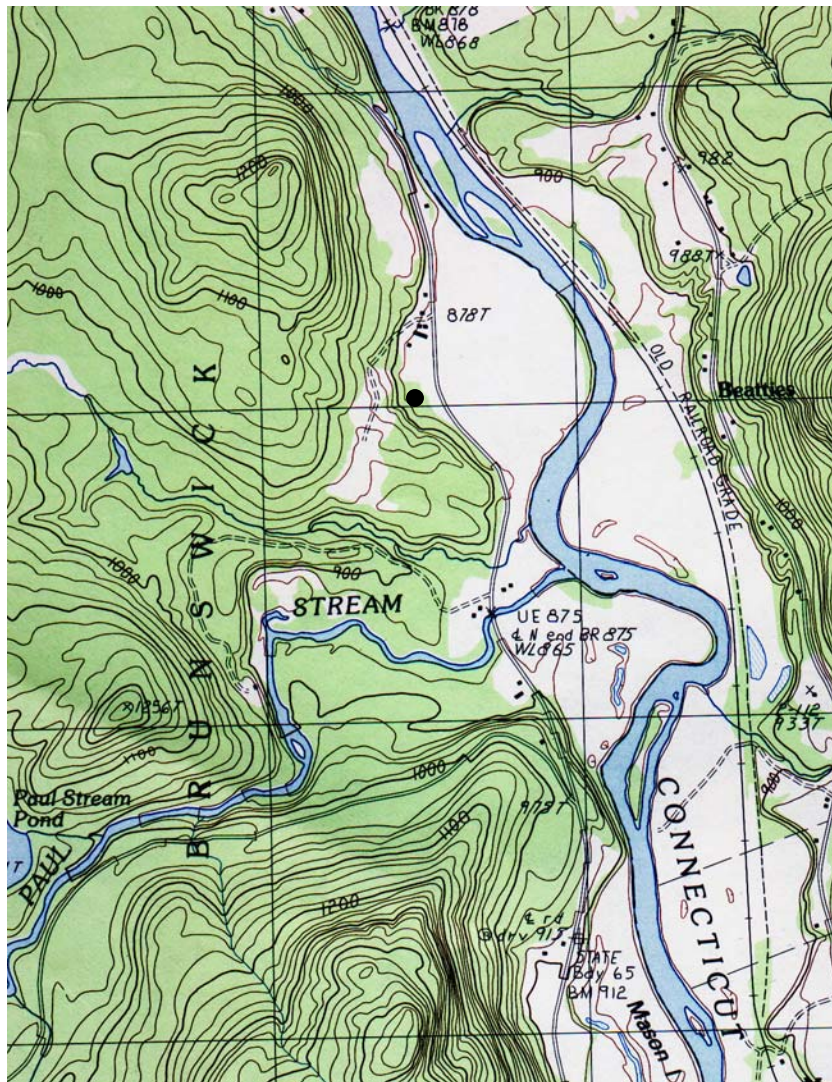

Figure DR5C. Location of Maidstone fan (represented by black dot) on USGS 1:24,000 topographic map. Quadrangle title: Stratford, New Hampshire-Vermont.
